# Supplementary material for: Effects of Ambient Temperature, Relative Humidity, and Precipitation on Diarrhea Incidence in Surabaya
Source: Int J Environ Res Public Health. 2023 Jan 28;20(3):2313. doi: 10.3390/ijerph20032313 (PMC9916310; doi:10.3390/ijerph20032313)
Supplement: Supplementary file 1 [file ijerph-20-02313-s001.zip › Supplementary Tables.pdf]

# **Effects of Ambient Temperature, Relative Humidity and Precipitation on Diarrhea Incidence in Surabaya**

Bima Sakti Satria Wibawa <sup>1,†</sup>, Aussie Tahta Maharani <sup>2,†</sup>, Gerry Andhikaputra <sup>1</sup>,

Marsha Savira Agatha Putri <sup>3</sup>, Aditya Prana Iswara <sup>1,4</sup>, Amir Sapkota <sup>5</sup>,

Ayushi Sharma <sup>1,4</sup>, Arie Dipareza Syafei <sup>6</sup> and Yu-Chun Wang <sup>1,7,\*</sup>

1 Department of Environmental Engineering, College of Engineering, Chung Yuan Christian University, 200 Chung-Pei Road, Zhongli, Taoyuan City 320314, Taiwan

2 Institute of Tropical Disease, Universitas Airlangga, Surabaya 60286, Indonesia

3 Department of Environmental Health, Faculty of Health Science, Universitas Islam Lamongan, Lamongan 62211, Indonesia

4 Department of Civil Engineering, College of Engineering, Chung Yuan Christian University, 200 Chung-Pei Road, Zhongli, Taoyuan City 320314, Taiwan

5 Department of Epidemiology and Biostatistics, University of Maryland School of Public Health, Maryland, MD 20742, USA

6 Department of Environmental Engineering, Institut Teknologi Sepuluh Nopember, Surabaya 60111, Indonesia

7 Research Center for Environmental Changes, Academia Sinica, 128 Academia Road, Section 2, Nankang, Taipei 11529, Taiwan

\* Correspondence: ycwang@cycu.edu.tw;

Tel.: +886-3-265-4916; Fax: 886-3-265-4949

† These authors contributed equally to this work.

### Supplementary Table Legend

Supplementary Table S1 Spearman correlation for each weather variables.

|                   | Temperature | Precipitation | Relative humidity |
|-------------------|-------------|---------------|-------------------|
| Temperature       | 1           | -             | -                 |
| Precipitation     | 0.24        | 1             | -                 |
| Relative humidity | -0.16*      | 0.87*         | 1                 |

\*p-value<0.05

Supplementary Table S2 Variance inflation factors in models.

|                                                 | P-value | R <sup>2</sup> | Temperature | Precipitation | Relative Humidity |
|-------------------------------------------------|---------|----------------|-------------|---------------|-------------------|
| Temperature + Precipitation + Relative Humidity | 0.02    | 0.08           | 1.28        | 5.13          | 4.88              |
| Temperature + Precipitation                     | 0.05    | 0.02           | 1.03        | 1.01          | -                 |
| Temperature + Relative Humidity                 | 0.23    | 0.02           | 1.08        | -             | 1.05              |

Supplementary Table S3 Region and lag-specific relative risk (95% confidence interval) of diarrhea associated with the average temperature and relative humidity at 5th and 95th percentiles relative to lowest risk measurement (28.7°C for temperature and 75.2% for relative humidity) from January 2018 to September 2020.

| Lag                                              | Regions of Surabaya      |                          |                          |                          |                          |
|--------------------------------------------------|--------------------------|--------------------------|--------------------------|--------------------------|--------------------------|
|                                                  | North                    | Central                  | West                     | South                    | East                     |
| Extreme low temperature (5th percentile)         |                          |                          |                          |                          |                          |
| 0                                                | 0.82 (0.59, 1.05)        | 1.21 (0.01, 2.39)        | 1.03 (0.83, 1.23)        | 1.63 (0.58, 2.67)        | <b>3.22 (2.71, 3.74)</b> |
| 1                                                | 0.45 (-0.67, 1.56)       | 0.94 (0.61, 1.28)        | 0.91 (0.75, 1.04)        | 1.03 (0.89, 1.16)        | 0.71 (0.61, 0.82)        |
| 2                                                | 0.57 (0.52, 0.62)        | 0.14 (0.11, 0.18)        | 0.95 (0.79, 1.11)        | 0.62 (0.51, 0.72)        | 2.09 (-0.76, 4.94)       |
| Extreme high temperature (95th percentile)       |                          |                          |                          |                          |                          |
| 0                                                | 0.45 (0.33, 0.57)        | 0.45 (0.01, 0.91)        | 0.95 (0.77, 1.14)        | 0.56 (0.21, 0.92)        | 0.22 (0.18, 0.25)        |
| 1                                                | 6.24 (-9.28, 21.8)       | 0.09 (0.06, 0.12)        | <b>1.32 (1.11, 1.53)</b> | <b>2.14 (1.86, 2.42)</b> | <b>5.39 (4.61, 6.17)</b> |
| 2                                                | 0.79 (0.72, 0.86)        | 0.28 (0.21, 0.36)        | 1.09 (0.91, 1.27)        | <b>2.06 (1.72, 2.41)</b> | 1.61 (-0.58, 3.77)       |
| Extreme low relative humidity (5th percentile)   |                          |                          |                          |                          |                          |
| 0                                                | 0.89 (0.69, 1.08)        | 1.84 (0.11, 3.58)        | 0.86 (0.72, 0.99)        | 0.93 (0.46, 1.41)        | 1.41 (0.65, 2.16)        |
| 1                                                | 0.22 (-0.79, 1.24)       | 0.71 (0.53, 0.86)        | 0.51 (0.38, 0.63)        | 0.34 (0.22, 0.46)        | 0.19 (0.06, 0.31)        |
| 2                                                | <b>1.66 (1.51, 1.81)</b> | <b>1.14 (1.02, 1.27)</b> | 0.96 (0.76, 1.15)        | 1.15 (0.96, 1.34)        | 1.19 (-1.36, 3.75)       |
| Extreme high relative humidity (95th percentile) |                          |                          |                          |                          |                          |
| 0                                                | <b>2.08 (1.62, 2.53)</b> | 7.85 (0.45, 15.3)        | <b>2.13 (1.79, 2.47)</b> | 1.06 (0.52, 1.59)        | 0.19 (0.09, 0.29)        |
| 1                                                | 1.61 (-5.75, 8.96)       | <b>1.72 (1.31, 2.13)</b> | 0.97 (0.73, 1.22)        | 0.71 (0.46, 0.95)        | 2.32 (0.81, 3.85)        |
| 2                                                | 0.52 (0.48, 0.57)        | 0.52 (0.46, 0.58)        | 0.37 (0.31, 0.45)        | 0.85 (0.71, 0.99)        | 0.37 (-0.42, 1.17)       |

Supplementary Table S4 Region and lag-specific relative risk (95% confidence interval) of diarrhea associated with the average temperature and precipitation at 5th and 95th percentiles relative to lowest risk measurement (28.7°C for temperature and 155 mm for precipitation) from January 2018 to September 2020.

| Lag                                          | Regions of Surabaya      |                          |                          |                          |                          |
|----------------------------------------------|--------------------------|--------------------------|--------------------------|--------------------------|--------------------------|
|                                              | North                    | Central                  | West                     | South                    | East                     |
| Extreme low temperature (5th percentile)     |                          |                          |                          |                          |                          |
| 0                                            | 1.02 (0.85, 1.18)        | 0.69 (0.47, 0.29)        | 1.13 (0.99, 1.28)        | 1.67 (0.59, 2.75)        | <b>2.24 (1.75, 2.73)</b> |
| 1                                            | 0.93 (-0.36, 2.22)       | 0.93 (0.11, 1.75)        | 1.09 (0.69, 1.49)        | <b>1.99 (1.22, 2.77)</b> | <b>1.42 (1.22, 1.61)</b> |
| 2                                            | 0.68 (0.61, 0.76)        | 0.77 (0.61, 0.93)        | 0.86 (0.56, 1.15)        | 0.59 (0.49, 0.70)        | 0.79 (-1.73, 3.33)       |
| Extreme high temperature (95th percentile)   |                          |                          |                          |                          |                          |
| 0                                            | 0.66 (0.56, 0.77)        | 0.53 (0.36, 0.69)        | 0.83 (0.72, 0.93)        | 0.53 (0.19, 0.87)        | 0.09 (0.07, 0.11)        |
| 1                                            | 1.62 (-0.63, 3.87)       | 0.13 (0.02, 0.25)        | 0.79 (0.51, 1.07)        | 0.63 (0.39, 0.88)        | <b>1.32 (1.14, 1.5)</b>  |
| 2                                            | 0.99 (0.9, 1.11)         | 0.39 (0.32, 0.48)        | 1.26 (0.82, 1.69)        | <b>2.17 (1.79, 2.56)</b> | 4.33 (-9.35, 18)         |
| Extreme low precipitation (5th percentile)   |                          |                          |                          |                          |                          |
| 0                                            | 0.82 (0.69, 0.95)        | 0.69 (0.48, 0.91)        | 0.91 (0.81, 1.02)        | 1.01 (0.49, 1.53)        | 1.54 (0.71, 2.38)        |
| 1                                            | 0.63 (-0.53, 1.79)       | 0.83 (0.12, 1.54)        | 0.88 (0.64, 1.13)        | 0.91 (0.57, 1.24)        | 0.64 (0.57, 0.71)        |
| 2                                            | <b>1.13 (1.02, 1.24)</b> | 0.69 (0.52, 0.85)        | 0.95 (0.56, 1.33)        | 1.04 (0.85, 1.23)        | 1.21 (-4.22, 6.61)       |
| Extreme high precipitation (95th percentile) |                          |                          |                          |                          |                          |
| 0                                            | <b>2.18 (1.83, 2.54)</b> | <b>3.05 (2.09, 4.01)</b> | <b>1.31 (1.16, 1.45)</b> | 0.98 (0.48, 1.48)        | 0.18 (0.08, 0.28)        |
| 1                                            | 0.81 (-0.68, 2.27)       | 1.14 (0.17, 2.11)        | 0.64 (0.46, 0.82)        | 0.47 (0.29, 0.64)        | 0.65 (0.59, 0.72)        |
| 2                                            | 0.48 (0.43, 0.53)        | 0.31 (0.24, 0.39)        | 0.61 (0.36, 0.86)        | 0.93 (0.76, 1.11)        | 1.41 (-4.96, 7.76)       |
